# Supplementary material for: Volcanic synchronisation of the EPICA-DC and TALDICE ice cores for the last 42 kyr BP
Source: Copernicus journal article supplement (doi:10.5194/cp-8-509-2012), 2012-03-14
Supplement: Supplementary file 1 [file Supplementary TD Holocene dating.xls]

## Sheet: Foglio1
TALDICE Holocene dating
This is a synchronised age scale of the TALDICE ice core built via synchronisation with the EDC model by Lemiuex-Dudon et al. (2010)
Questions may be directed to Mirko Severi (mirko.severi@unifi.it)
Reference to this table
(1)	Severi, M., Udisti R., Becagli S., Stenni B., Traversi R.: Volcanic synchronisation of the EPICA-DC and TALDICE ice cores for the last 42 kyr BP, Climate of the Past, 2012.
Depth (m)	Age (yr BP)
0	-54
1	-50.903
2	-47.718
3	-44.433
4	-40.838
5	-36.873
6	-32.559
7	-27.919
8	-22.973
9	-17.739
10	-12.234
11	-6.4735
12	-0.47217
13	5.7567
14	12.201
15	18.848
16	25.689
17	32.713
18	39.91
19	47.272
20	54.791
21	62.785
22	71.109
23	79.396
24	87.644
25	95.883
26	104.11
27	112.33
28	120.52
29	128.63
30	136.47
31	144.43
32	152.92
33	161.65
34	170.51
35	179.44
36	188.42
37	197.57
38	206.95
39	216.43
40	225.9
41	235.34
42	244.69
43	253.95
44	263.11
45	272.26
46	281.53
47	290.91
48	300.32
49	309.55
50	318.46
51	327.33
52	337.86
53	348.6
54	359.27
55	369.84
56	380.33
57	390.74
58	401.09
59	411.37
60	421.61
61	431.83
62	442.05
63	452.34
64	462.76
65	473.48
66	484.73
67	496.33
68	507.63
69	518.59
70	529.31
71	539.84
72	550.23
73	560.51
74	570.71
75	580.83
76	590.89
77	600.9
78	610.87
79	620.73
80	630.46
81	640.1
82	649.74
83	659.53
84	669.59
85	679.77
86	693.57
87	705.61
88	717.66
89	729.9
90	742.31
91	754.73
92	766.73
93	778.49
94	790.26
95	802.01
96	813.76
97	825.49
98	837.22
99	848.94
100	860.65
101	872.35
102	884.04
103	895.72
104	907.39
105	919.05
106	930.71
107	942.36
108	953.99
109	965.62
110	977.25
111	988.86
112	1000.5
113	1012.1
114	1023.7
115	1035.2
116	1046.8
117	1058.4
118	1070
119	1081.5
120	1093.1
121	1104.7
122	1116.2
123	1127.8
124	1139.4
125	1151.1
126	1162.8
127	1174.6
128	1186.8
129	1199.9
130	1213.5
131	1227.4
132	1241.3
133	1255
134	1267.9
135	1280.4
136	1292.5
137	1304.4
138	1316.1
139	1327.5
140	1338.7
141	1349.8
142	1360.6
143	1371.2
144	1381.6
145	1392.3
146	1405.4
147	1419.2
148	1433.1
149	1446.9
150	1460.6
151	1474.2
152	1487.7
153	1501.1
154	1514.4
155	1527.6
156	1540.7
157	1553.8
158	1566.8
159	1579.9
160	1593
161	1606.2
162	1619.4
163	1632.7
164	1646
165	1659.3
166	1672.7
167	1686.1
168	1699.7
169	1713.5
170	1727.3
171	1741.2
172	1754.9
173	1768.5
174	1781.9
175	1795.2
176	1808.3
177	1821.4
178	1834.3
179	1847.3
180	1860.3
181	1873.4
182	1886.8
183	1900.9
184	1915.6
185	1930.8
186	1945.7
187	1957.7
188	1969.3
189	1981.3
190	1994.2
191	2007.6
192	2021.4
193	2035.3
194	2049.5
195	2063.7
196	2078
197	2092.4
198	2106.8
199	2121.3
200	2135.8
201	2150.3
202	2164.8
203	2179.4
204	2194
205	2208.6
206	2223.2
207	2237.8
208	2252.4
209	2267
210	2281.7
211	2296.3
212	2311
213	2325.6
214	2340.3
215	2355
216	2369.6
217	2384.3
218	2399
219	2413.8
220	2428.5
221	2443.3
222	2458.1
223	2473
224	2487.8
225	2502.7
226	2517.6
227	2532.6
228	2547.5
229	2562.5
230	2577.5
231	2592.6
232	2607.7
233	2622.8
234	2637.9
235	2653.1
236	2668.3
237	2683.5
238	2698.7
239	2714
240	2729.3
241	2744.7
242	2760.1
243	2775.5
244	2791
245	2806.5
246	2822
247	2837.6
248	2853.2
249	2868.8
250	2884.5
251	2900.2
252	2916
253	2931.8
254	2947.7
255	2963.6
256	2979.5
257	2995.5
258	3011.5
259	3027.6
260	3043.7
261	3059.9
262	3076.1
263	3092.4
264	3108.7
265	3125.1
266	3141.7
267	3158.3
268	3175
269	3191.8
270	3208.5
271	3225.2
272	3241.9
273	3258.6
274	3275.3
275	3291.9
276	3308.5
277	3325.1
278	3341.7
279	3358.3
280	3374.8
281	3391.7
282	3408.9
283	3426.2
284	3443.6
285	3460.9
286	3478.2
287	3495.4
288	3512.5
289	3529.5
290	3546.4
291	3563.3
292	3580.1
293	3596.9
294	3613.5
295	3629.8
296	3645.6
297	3661.1
298	3676.7
299	3692.6
300	3708.9
301	3725.6
302	3742.6
303	3759.7
304	3777.1
305	3794.6
306	3812.3
307	3830
308	3847.9
309	3865.8
310	3884
311	3902.2
312	3920.6
313	3939.1
314	3957.7
315	3976.4
316	3994.9
317	4013.3
318	4031.3
319	4048.9
320	4066.6
321	4084.2
322	4101.9
323	4119.6
324	4137.2
325	4154.9
326	4172.5
327	4190.2
328	4207.9
329	4225.5
330	4243.2
331	4260.9
332	4278.5
333	4296.2
334	4313.9
335	4331.6
336	4349.3
337	4366.9
338	4384.6
339	4402.3
340	4420
341	4437.7
342	4455.5
343	4473.4
344	4491.2
345	4509.1
346	4527.1
347	4545
348	4563.1
349	4581.2
350	4599.4
351	4617.7
352	4636.3
353	4655.2
354	4674.6
355	4693.9
356	4712.6
357	4731.1
358	4749.4
359	4767.7
360	4786
361	4804.2
362	4822.4
363	4840.6
364	4858.8
365	4877
366	4895.1
367	4913.2
368	4931.3
369	4949.2
370	4967.2
371	4985.1
372	5003.1
373	5021
374	5039
375	5056.9
376	5075
377	5093.1
378	5111.3
379	5129.5
380	5147.8
381	5166.1
382	5184.5
383	5203
384	5221.5
385	5240
386	5258.6
387	5277.2
388	5295.8
389	5314.5
390	5333.2
391	5351.9
392	5370.7
393	5389.5
394	5408.3
395	5427.2
396	5446
397	5464.9
398	5483.8
399	5502.7
400	5521.7
401	5540.7
402	5559.6
403	5578.6
404	5597.7
405	5616.7
406	5635.7
407	5654.8
408	5673.9
409	5693
410	5712.1
411	5731.2
412	5750.3
413	5769.5
414	5788.6
415	5807.8
416	5826.9
417	5846.1
418	5865.3
419	5884.5
420	5903.7
421	5922.9
422	5942.1
423	5961.3
424	5980.6
425	5999.8
426	6019
427	6038.2
428	6057.5
429	6076.7
430	6096
431	6115.3
432	6134.6
433	6154
434	6173.4
435	6192.9
436	6212.6
437	6232.6
438	6253.4
439	6274.5
440	6295.2
441	6315.7
442	6336.1
443	6356.4
444	6376.5
445	6396.3
446	6415.9
447	6435
448	6453.6
449	6471.4
450	6488.1
451	6505.5
452	6526.4
453	6547.4
454	6568.3
455	6589
456	6609.4
457	6629.6
458	6649.5
459	6669.2
460	6688.7
461	6707.9
462	6727
463	6745.9
464	6764.8
465	6783.5
466	6802.1
467	6820.6
468	6839.2
469	6857.7
470	6876.2
471	6894.8
472	6913.4
473	6932
474	6950.8
475	6969.7
476	6988.7
477	7007.9
478	7027.2
479	7046.7
480	7066.5
481	7086.5
482	7106.8
483	7127.6
484	7148.8
485	7170.4
486	7192.2
487	7214.2
488	7236.3
489	7258.5
490	7280.8
491	7303.1
492	7325.4
493	7347.8
494	7370.1
495	7392.4
496	7414.7
497	7437
498	7459.2
499	7481.4
500	7503.5
501	7525.6
502	7547.6
503	7569.6
504	7591.5
505	7613.3
506	7635
507	7656.7
508	7678.3
509	7699.8
510	7721.3
511	7742.7
512	7764
513	7785.5
514	7807.7
515	7830.3
516	7853.2
517	7876.5
518	7899.9
519	7923.6
520	7947.4
521	7971.3
522	7995.4
523	8019.5
524	8043.7
525	8068
526	8092.3
527	8116.8
528	8141.6
529	8166.6
530	8191.8
531	8217.1
532	8242.6
533	8268.2
534	8293.8
535	8319.5
536	8345.3
537	8371.2
538	8397
539	8423
540	8448.9
541	8474.9
542	8500.9
543	8526.9
544	8553
545	8579.1
546	8605.4
547	8631.8
548	8658.3
549	8684.9
550	8711.6
551	8738.4
552	8765.2
553	8792.1
554	8818.9
555	8845.8
556	8872.7
557	8899.5
558	8926.2
559	8952.8
560	8979.3
561	9005.7
562	9031.9
563	9057.9
564	9083.8
565	9109.7
566	9135.5
567	9161.3
568	9187.2
569	9212.9
570	9238.7
571	9264.4
572	9290.1
573	9315.8
574	9341.4
575	9367
576	9392.5
577	9418
578	9443.4
579	9468.7
580	9494
581	9519.2
582	9544.3
583	9569.3
584	9594.2
585	9619
586	9643.6
587	9668.1
588	9692.3
589	9716.3
590	9740.1
591	9763.5
592	9786.5
593	9808.9
594	9830.8
595	9852.1
596	9873.2
597	9895.2
598	9918.9
599	9943.5
600	9968.5
601	9993.6
602	10019
603	10044
604	10068
605	10092
606	10116
607	10140
608	10163
609	10185
610	10206
611	10228
612	10249
613	10271
614	10293
615	10314
616	10336
617	10358
618	10380
619	10402
620	10426
621	10450
622	10474
623	10497
624	10520
625	10543
626	10565
627	10588
628	10610
629	10632
630	10654
631	10676
632	10698
633	10721
634	10743
635	10765
636	10787
637	10810
638	10832
639	10855
640	10878
641	10900
642	10923
643	10946
644	10969
645	10992
646	11015
647	11038
648	11062
649	11085
650	11108
651	11132
652	11155
653	11178
654	11199
655	11221
656	11244
657	11267
658	11292
659	11316
660	11340
661	11364
662	11388
663	11411
664	11433
665	11454
666	11476
667	11497
668	11520
669	11542
670	11566
671	11589
672	11614
673	11638
674	11663
675	11688
676	11714
677	11740
678	11766
679	11793
680	11820
681	11847
682	11874
683	11902
684	11930
685	11958
686	11987
687	12015
