# Supplementary material for: Volcanic synchronisation of the EPICA-DC and TALDICE ice cores for the last 42 kyr BP
Source: Copernicus journal article supplement (doi:10.5194/cp-8-509-2012), 2012-03-14
Supplement: Supplementary file 2 [file Supplementary TD-EDC volcanic synthesis.xls]

## Sheet: Foglio1
TALDICE/EDC volcanic synthesis
This is a list of the common volcanic signatures found in the TALDICE and EDC ice cores.
Questions may be directed to Mirko Severi (mirko.severi@unifi.it)
Reference to this table
(1)	Severi, M., Udisti R., Becagli S., Stenni B., Traversi R.: Volcanic synchronisation of the EPICA-DC and TALDICE ice cores for the last 42 kyr BP, Climate of the Past, 2012.
TALDICE depth (m)	EDC depth (m)	EDC drilling
2.75	0.64	Snow pit
20.37	8	EDC96
23.46	9.54	EDC96
29.56	12.34	EDC96
30.37	12.68	EDC96
36.14	15.36	EDC96
42.86	18.62	EDC96
45.29	19.7	EDC96
48.82	21.24	EDC96
51.15	22.2	EDC96
53.2	23.2	EDC96
65.64	28.9	EDC96
67.36	29.77	EDC96
77.96	34.55	EDC96
83.49	36.96	EDC96
85.1	37.64	EDC96
85.94	38.12	EDC96
88.27	39.22	EDC96
91.55	40.79	EDC96
93.12	41.52	EDC96
128.6	57.83	EDC96
133.52	60.42	EDC96
142.17	64.2	EDC96
144.89	65.31	EDC96
152.84	69.15	EDC96
162.54	73.58	EDC96
167.45	75.79	EDC96
172.32	78.02	EDC96
182.82	82.62	EDC96
186.19	84.29	EDC96
188.31	85.1	EDC96
215.33	97.12	EDC96
264.63	119.81	EDC96
276.55	125.25	EDC96
280.07	126.85	EDC96
288.48	130.78	EDC96
294.93	133.84	EDC96
298.8	135.6	EDC96
308.21	140.3	EDC96
310.73	141.56	EDC96
317.32	144.93	EDC96
335.05	153.91	EDC96
340.77	156.78	EDC96
353.04	163.16	EDC96
354.84	164.16	EDC96
365.04	169.44	EDC96
377.83	176.14	EDC96
419.21	198.76	EDC96
437.33	208.75	EDC96
439.3	209.9	EDC96
450.03	215.72	EDC96
450.54	215.94	EDC96
455.95	219	EDC96
481.59	232.75	EDC96
509.25	249.29	EDC96
512.89	251.4	EDC96
526.24	259.44	EDC96
544.06	270.59	EDC96
562.84	283.15	EDC96
594.22	304.39	EDC96
596.32	305.7	EDC96
606.62	312.86	EDC96
608.05	313.86	EDC96
613.61	317.52	EDC96
619.24	321.15	EDC96
620.48	322.05	EDC96
645.21	338.68	EDC96
651.34	342.82	EDC96
652.67	343.74	EDC96
654.69	344.97	EDC96
663.28	350.8	EDC96
666.74	353	EDC96
717.18	387.44	EDC96
720.4	389.46	EDC96
725.67	393.15	EDC96
741.48	404.3	EDC96
763.2	419.89	EDC96
766.09	422.07	EDC96
774.47	428.33	EDC96
779.29	432.2	EDC96
786.55	438.29	EDC96
800.68	450.7	EDC96
804.46	454.18	EDC96
823.56	473.38	EDC96
833.44	483.42	EDC96
844.77	494.84	EDC96
852.7	502.94	EDC96
854.2	504.583	EDC96
863.63	514.84	EDC96
879.46	532.55	EDC96
893.16	548.12	EDC96
902.5	557.91	EDC96
903.65	559.09	EDC96
905.95	561.59	EDC96
908.84	564.62	EDC96
911.74	567.77	EDC96
912.39	568.46	EDC96
913.97	570.2	EDC96
922.24	579.23	EDC96
929.86	587.78	EDC96
935.31	593.67	EDC96
940.35	599.02	EDC96
948.24	607.22	EDC96
956.75	616.3	EDC96
966.75	626.89	EDC96
969.24	629.56	EDC96
972.18	632.7	EDC96
976.26	636.76	EDC96
977.38	637.84	EDC96
984.68	645.19	EDC96
985.84	646.35	EDC96
1000.52	660.56	EDC96
1002.32	662.3	EDC96
1007.25	666.82	EDC96
1012.29	671.49	EDC96
1014.63	673.68	EDC96
1016.93	675.91	EDC96
1018.75	677.66	EDC96
1021.31	680.05	EDC96
1028.38	686.45	EDC96
1032.05	689.62	EDC96
1034.28	691.63	EDC96
1034.81	692.12	EDC96
1042.92	699.56	EDC96
1044.49	701.12	EDC96
1045.22	701.77	EDC96
1046.56	703.07	EDC96
1064.44	719.19	EDC96
1064.88	719.62	EDC96
1072.91	726.87	EDC96
1085.66	738.19	EDC96
1087.39	739.8	EDC96
1097.72	748.8	EDC96
